# Supplementary material for: Methods for estimating the size of Google Scholar
Source: Springer Nature journal article supplement (doi:10.1007/s11192-015-1614-6), 2015-05-30
Supplement: 11192_2015_1614_MOESM1_ESM.pdf [file 11192_2015_1614_MOESM1_ESM.pdf]

**COMPLEMENTARY MATERIAL TO MANUSCRIPT:  
“Methods to estimate the size of Google Scholar”**

Enrique Orduna-Malea\*

EC3 Research Group. Instituto de Diseño y Fabricación, Camino de Vera s/n,  
Polytechnic University of Valencia (UPV), 46022 Valencia, Spain. E-mail:  
enorma@upv.es, Tel: +34 963879480

Juan M. Ayllón

EC3 Research Group. Facultad de Comunicación y Documentación, Universidad de  
Granada, 18071, Granada, Spain. E-mail: jayllon@ugr.es

Alberto Martin-Martin

EC3 Research Group. Facultad de Comunicación y Documentación, Universidad de  
Granada, 18071, Granada, Spain. E-mail: albertomartin@ugr.es

Emilio Delgado López-Cózar

EC3 Research Group. Facultad de Comunicación y Documentación, Universidad de  
Granada, 18071, Granada, Spain. E-mail: edelgado@ugr.es

**CONTENTS**

Annex I. Catalogue of empirical studies related to the size of Google Scholar.

Annex II. Empirical studies about Google Scholar according to unit of analysis and  
document type.

Annex III. Empirical studies about Google Scholar according to indicator measured.

Annex IV. Empirical studies about Google Scholar according to languages.

Annex V. Absurd queries on Google Scholar.

**APPENDIX I. CATALOGUE OF EMPIRICAL WORK RELATED TO THE SIZE OF GOOGLE SCHOLAR**

| AUTHORS                                                 | SAMPLE                                                                                                                   | UNIT                                     | 1          | 2          | 3          | 4     | 5 | 6 | 7 | 8 | 9      | 10     | 11 | 12 | 13 | 14 | 15 | 16 | 17 | 18  |     |
|---------------------------------------------------------|--------------------------------------------------------------------------------------------------------------------------|------------------------------------------|------------|------------|------------|-------|---|---|---|---|--------|--------|----|----|----|----|----|----|----|-----|-----|
| <b>KHABSA &amp; GILES (2014)</b>                        | 150 English written documents from MAS; 10 of the most cited documents in each of the 15 fields are randomly sampled.    | Citations                                | 86,870     |            | 41,778     |       |   |   |   |   |        |        |    |    |    |    |    |    |    |     |     |
| <b>KHABSA &amp; GILES (2014)</b>                        | 1,500 documents from MAS; 100 documents belonging to each field, with at least 1 citation.(n=114 million)                | Documents (million)                      | 99.3       | 49         | 48         |       |   |   |   |   |        |        |    |    |    |    |    |    |    |     |     |
| <b>ABDULLAH &amp; THELWALL (2014)</b>                   | Books (n= 1,357) and citations (n=2,254) of Malaysian books in AHSS disciplines.                                         | Documents                                | 499        |            |            |       |   |   |   |   |        |        |    |    |    |    |    |    |    |     |     |
|                                                         |                                                                                                                          | Documents (%)                            | 37         |            |            |       |   |   |   |   |        |        |    |    |    |    |    |    |    |     | 314 |
|                                                         |                                                                                                                          | Citations per book                       | 1.67       |            |            |       |   |   |   |   |        |        |    |    |    |    |    |    |    |     | 23  |
| <b>WINTER &amp; ZADPOOR &amp; DODOU (2014)</b>          | Number of citations on to Garfield for WoS and GS                                                                        | Citations                                | 1,231      | 607        |            |       |   |   |   |   |        |        |    |    |    |    |    |    |    |     |     |
|                                                         |                                                                                                                          | Unique citations                         | 703        | 153        |            |       |   |   |   |   |        |        |    |    |    |    |    |    |    |     |     |
|                                                         |                                                                                                                          | (%)                                      | 90         | 48.2       |            |       |   |   |   |   |        |        |    |    |    |    |    |    |    |     |     |
| <b>HALEY (2014)</b>                                     | 50 Top economics finance journals were selected and then scored using both GS and MAS using the PoP software (1993–2012) | Average h-index                          | 154.40     | 78.98      |            |       |   |   |   |   |        |        |    |    |    |    |    |    |    |     |     |
|                                                         |                                                                                                                          | Average h-index                          | 267.36     | 125.72     |            |       |   |   |   |   |        |        |    |    |    |    |    |    |    |     |     |
|                                                         |                                                                                                                          | Average AWCRC                            | 9834.00    | 2740.87    |            |       |   |   |   |   |        |        |    |    |    |    |    |    |    |     |     |
|                                                         |                                                                                                                          | Average e-index                          | 186.21     | 81.00      |            |       |   |   |   |   |        |        |    |    |    |    |    |    |    |     |     |
| <b>ORDUÑA-MALEA &amp; DELGADO LÓPEZ-CÓZAR (2014)</b>    | World weekly (average) size and monthly growth rate per source                                                           | Weekly size (average)                    | 68,545,750 | 27,904,896 | 28,113,479 |       |   |   |   |   |        |        |    |    |    |    |    |    |    |     |     |
|                                                         |                                                                                                                          | Monthly growth rate (%)                  | 11.15      | 0.37       | 0.41       |       |   |   |   |   |        |        |    |    |    |    |    |    |    |     |     |
| <b>ORTEGA &amp; AGUILLO (2014)</b>                      | Analysis of the 771 personal profiles appearing in both the MAS and the GSC.                                             | Documents (%)                            | 158.3      |            | 89.5       |       |   |   |   |   |        |        |    |    |    |    |    |    |    |     |     |
|                                                         |                                                                                                                          | Citations (%)                            | 327.4      |            | 76.7       |       |   |   |   |   |        |        |    |    |    |    |    |    |    |     |     |
|                                                         |                                                                                                                          | %                                        | 155.8      |            | 72.1       |       |   |   |   |   |        |        |    |    |    |    |    |    |    |     |     |
| <b>CARDENAS &amp; UDO (2013)</b>                        | Knowledge management (KM) articles published between 1993 and 2012                                                       | KM papers                                | 33,600     | 9,887      |            |       |   |   |   |   |        |        |    |    |    |    |    |    |    |     |     |
|                                                         |                                                                                                                          | KM papers (%)                            | 77.26      | 28.59      |            |       |   |   |   |   |        |        |    |    |    |    |    |    |    |     |     |
|                                                         |                                                                                                                          | KM papers in USA                         | 12,434     | 2,084      |            |       |   |   |   |   |        |        |    |    |    |    |    |    |    |     |     |
|                                                         |                                                                                                                          | KM papers in USA (%)                     | 80.65      | 14.35      |            |       |   |   |   |   |        |        |    |    |    |    |    |    |    |     |     |
| <b>ADRIAANSE &amp; RENSLEIGH (2013)</b>                 | African scholarly environmental sciences journals the period 2004-2008 (n=3,199)                                         | Citations                                | 2,715      | 2,740      |            | 2,192 |   |   |   |   |        |        |    |    |    |    |    |    |    |     |     |
|                                                         |                                                                                                                          | Overall coverage (%)                     | 84.9       | 85.7       |            | 68.5  |   |   |   |   |        |        |    |    |    |    |    |    |    |     |     |
|                                                         |                                                                                                                          | Inconsistencies (%)                      | 448        | 165        |            | 14    |   |   |   |   |        |        |    |    |    |    |    |    |    |     |     |
| <b>CABEZAS-CLAVIJO &amp; DELGADO LÓPEZ-CÓZAR (2013)</b> | Most relevant journals and researchers in the field of intensive care medicine.                                          | Average Journal H-index                  | 36         | 28         |            | 32    |   |   |   |   |        |        |    |    |    |    |    |    |    |     |     |
|                                                         |                                                                                                                          | Average Author H-index                   | 29         | 23         |            | 25    |   |   |   |   |        |        |    |    |    |    |    |    |    |     |     |
| <b>DELGADO LÓPEZ-CÓZAR &amp; CABEZAS-CLAVIJO (2013)</b> | N° Journals indexed GSM, JCR and SJR                                                                                     | Journals                                 | 40,000     |            |            |       |   |   |   |   | 19,708 | 10,677 |    |    |    |    |    |    |    |     |     |
| <b>DELGADO LÓPEZ-CÓZAR &amp; REPISO (2013)</b>          | Sample of journals from the field of communication studies indexed in three databases.                                   | Number of communication journals covered | 277        | 106        |            | 167   |   |   |   |   |        |        |    |    |    |    |    |    |    |     |     |
| <b>HUH (2013)</b>                                       | Citation indicators of the Korean journal of urology before and after 2010                                               | Citations                                | 428        | 86         |            | 134   |   |   |   |   |        |        |    |    |    |    |    |    |    |     |     |
|                                                         |                                                                                                                          | (%)                                      | 44.70      | 9          |            | 14.02 |   |   |   |   |        |        |    |    |    |    |    |    |    | 207 | 101 |

| AUTHORS                                                  | SAMPLE                                                                                                                            | UNIT                                                                                                      | 1                                                                                  | 2     | 3 | 4      | 5 | 6 | 7 | 8 | 9 | 10 | 11 | 12 | 13 | 14 | 15 | 16 | 17 | 18 |        |     |       |
|----------------------------------------------------------|-----------------------------------------------------------------------------------------------------------------------------------|-----------------------------------------------------------------------------------------------------------|------------------------------------------------------------------------------------|-------|---|--------|---|---|---|---|---|----|----|----|----|----|----|----|----|----|--------|-----|-------|
| <b>ZARIFMAHMOUDI &amp; KIANIFAR &amp; SADEGHI (2013)</b> | Citations to 2011-2012 articles of Iranian Journal of Basic Medical Sciences (IJBMS) in three resources                           | Citations                                                                                                 | 59                                                                                 | 20    |   | 30     |   |   |   |   |   |    |    |    |    |    |    |    |    |    |        |     |       |
|                                                          |                                                                                                                                   | (%)                                                                                                       | 44.56                                                                              | 29.59 |   | 25.85  |   |   |   |   |   |    |    |    |    |    |    |    |    |    |        |     |       |
|                                                          |                                                                                                                                   | Unique citations                                                                                          | 40                                                                                 | 2     |   | 6      |   |   |   |   |   |    |    |    |    |    |    |    |    |    |        |     |       |
|                                                          |                                                                                                                                   | GS and WoS = 11; GS and SCO = 17; SCO and WoS = 16; GS and SCO and WoS =9                                 |                                                                                    |       |   |        |   |   |   |   |   |    |    |    |    |    |    |    |    |    |        |     |       |
| <b>AMARA &amp; LANDRY (2012)</b>                         | Data of scholars of Canadian business schools, used jointly with data extracted from the WoS and GS databases .                   | Contributions record                                                                                      | 21.56                                                                              | 5.08  |   |        |   |   |   |   |   |    |    |    |    |    |    |    |    |    |        |     |       |
|                                                          |                                                                                                                                   | Citations record                                                                                          | 271.53                                                                             | 50.85 |   |        |   |   |   |   |   |    |    |    |    |    |    |    |    |    |        |     |       |
|                                                          |                                                                                                                                   | Hirsch h-index                                                                                            | 4.57                                                                               | 1.87  |   |        |   |   |   |   |   |    |    |    |    |    |    |    |    |    |        |     |       |
|                                                          |                                                                                                                                   | Proportion of contributions                                                                               | 72.21                                                                              | 27.79 |   |        |   |   |   |   |   |    |    |    |    |    |    |    |    |    |        |     |       |
|                                                          |                                                                                                                                   | Proportions of citations                                                                                  | 69.28                                                                              | 30.72 |   |        |   |   |   |   |   |    |    |    |    |    |    |    |    |    |        |     |       |
| <b>DE GROOTE &amp; RASZEWSKI (2012)</b>                  | 100 articles from the publications of 30 College of Nursing faculty (n=3,000)                                                     | Articles                                                                                                  | 927                                                                                | 795   |   | 974    |   |   |   |   |   |    |    |    |    |    |    |    |    |    |        |     |       |
|                                                          |                                                                                                                                   | %                                                                                                         | 34.38                                                                              | 29.49 |   | 36.13  |   |   |   |   |   |    |    |    |    |    |    |    |    |    |        |     |       |
|                                                          |                                                                                                                                   | H-index                                                                                                   | 316                                                                                | 215   |   | 271    |   |   |   |   |   |    |    |    |    |    |    |    |    |    |        |     |       |
|                                                          |                                                                                                                                   | Aggregated h-index                                                                                        | WoS, Scopus, GS, and CINAHL =131; WoS, Scopus and CINAHL=339; WoS and Scopus = 326 |       |   |        |   |   |   |   |   |    |    |    |    |    |    |    |    |    |        |     |       |
|                                                          |                                                                                                                                   | Citations                                                                                                 | 3,492                                                                              | 1,406 |   | 2,437  |   |   |   |   |   |    |    |    |    |    |    |    |    |    |        | 966 |       |
|                                                          |                                                                                                                                   | %                                                                                                         | 42.10                                                                              | 16.93 |   | 29.34  |   |   |   |   |   |    |    |    |    |    |    |    |    |    |        |     | 11.63 |
|                                                          |                                                                                                                                   | Unique citations                                                                                          | 1,312                                                                              | 93    |   | 250    |   |   |   |   |   |    |    |    |    |    |    |    |    |    |        |     | 273   |
| %                                                        | 68.05                                                                                                                             | 4.82                                                                                                      |                                                                                    | 12.97 |   |        |   |   |   |   |   |    |    |    |    |    |    |    |    |    | 14.16  |     |       |
| <b>GIL ROALES-NIETO &amp; O'NEILL (2012)</b>             | Articles published in IJP&PT and cited (2001-2010)                                                                                | Articles                                                                                                  | 238                                                                                | 238   |   | 231    |   |   |   |   |   |    |    |    |    |    |    |    |    |    |        |     |       |
|                                                          |                                                                                                                                   | Cited Articles                                                                                            | 208                                                                                | 171   |   | 167    |   |   |   |   |   |    |    |    |    |    |    |    |    |    |        |     |       |
|                                                          |                                                                                                                                   | (%)                                                                                                       | 87                                                                                 | 72    |   | 72     |   |   |   |   |   |    |    |    |    |    |    |    |    |    |        |     |       |
| <b>LASDA BERGMAN (2012)</b>                              | Top five journals ranked highest in overall quality by the 556 faculty members surveyed (2005)                                    | Citations                                                                                                 | 3,272                                                                              | 1,741 |   | 2,126  |   |   |   |   |   |    |    |    |    |    |    |    |    |    |        |     |       |
|                                                          |                                                                                                                                   | Unique citations                                                                                          | 1,904                                                                              | 197   |   | 339    |   |   |   |   |   |    |    |    |    |    |    |    |    |    |        |     |       |
|                                                          |                                                                                                                                   | Overload (%)                                                                                              | 44.2                                                                               | 4.6   |   | 7.79   |   |   |   |   |   |    |    |    |    |    |    |    |    |    |        |     |       |
|                                                          |                                                                                                                                   | GS and WoS = 81 (1.9%); GS and SCO = 324 (7.5%); SCO and WoS = 502 (11.7%); GS, SCO and WoS = 961 (22.3%) |                                                                                    |       |   |        |   |   |   |   |   |    |    |    |    |    |    |    |    |    |        |     |       |
| <b>MIRI &amp; RAOOFI &amp; HEIDARI (2012)</b>            | 104 articles of Hepat Mon published in 2009 and 2008 which had been cited in 2010 in three databases including WoS, SCO and GS.   | Articles                                                                                                  | 100                                                                                | 87    |   | 91     |   |   |   |   |   |    |    |    |    |    |    |    |    |    |        |     |       |
|                                                          |                                                                                                                                   | (%)                                                                                                       | 91                                                                                 | 83.65 |   | 87.5   |   |   |   |   |   |    |    |    |    |    |    |    |    |    |        |     |       |
|                                                          |                                                                                                                                   | Citations                                                                                                 | 85                                                                                 | 69    |   | 86     |   |   |   |   |   |    |    |    |    |    |    |    |    |    |        |     |       |
| <b>ZARIFMAHMOUDI &amp; SADEGHI (2012)</b>                | Citations to 100 articles of Iranian Journal of Nuclear Medicine (IJNM) from 2006-2012 in SCO and GS.                             | Articles                                                                                                  | 100                                                                                |       |   | 99     |   |   |   |   |   |    |    |    |    |    |    |    |    |    |        |     |       |
|                                                          |                                                                                                                                   | Coverage (%)                                                                                              | 100                                                                                |       |   | 99     |   |   |   |   |   |    |    |    |    |    |    |    |    |    |        |     |       |
|                                                          |                                                                                                                                   | Unique citations                                                                                          | 18                                                                                 |       |   | 9      |   |   |   |   |   |    |    |    |    |    |    |    |    |    |        |     |       |
|                                                          |                                                                                                                                   | GS and SCO = 44 overlapping citations.                                                                    |                                                                                    |       |   |        |   |   |   |   |   |    |    |    |    |    |    |    |    |    |        |     |       |
| <b>KOUSHA &amp; THELWALL &amp; REZAIE (2011)</b>         | Comparisons of citation counts for authored books submitted to 7 social sciences and humanities disciplines in the 2008 (n=1,000) | Citations                                                                                                 | 39,733                                                                             |       |   | 12,462 |   |   |   |   |   |    |    |    |    |    |    |    |    |    | 17,905 |     |       |
|                                                          |                                                                                                                                   | Google Books and Google Scholar citations were 143 and 18% of Scopus citations, respectively.             |                                                                                    |       |   |        |   |   |   |   |   |    |    |    |    |    |    |    |    |    |        |     |       |

| AUTHORS                                          | SAMPLE                                                                                                                                    | UNIT                                                                                                      | 1     | 2     | 3 | 4     | 5 | 6 | 7 | 8 | 9 | 10 | 11 | 12 | 13 | 14 | 15 | 16 | 17 | 18 |  |
|--------------------------------------------------|-------------------------------------------------------------------------------------------------------------------------------------------|-----------------------------------------------------------------------------------------------------------|-------|-------|---|-------|---|---|---|---|---|----|----|----|----|----|----|----|----|----|--|
| <b>KOUSHA &amp; THELWALL &amp; REZAIE (2011)</b> | Relative overlap and unique citations for GS and Scopus for 100 sampled authored books submitted to the 2008 Research Assessment Exercise | Citations                                                                                                 | 2,599 |       |   | 789   |   |   |   |   |   |    |    |    |    |    |    |    |    |    |  |
|                                                  |                                                                                                                                           | Overlapping GS and SCO= 431                                                                               |       |       |   |       |   |   |   |   |   |    |    |    |    |    |    |    |    |    |  |
|                                                  |                                                                                                                                           | Relative overlap                                                                                          | 16.58 |       |   | 54.63 |   |   |   |   |   |    |    |    |    |    |    |    |    |    |  |
|                                                  |                                                                                                                                           | Unique citations                                                                                          | 2,168 |       |   | 358   |   |   |   |   |   |    |    |    |    |    |    |    |    |    |  |
|                                                  |                                                                                                                                           | (%)                                                                                                       | 83.42 |       |   | 45.37 |   |   |   |   |   |    |    |    |    |    |    |    |    |    |  |
| <b>BAR-ILAN (2010)</b>                           | Citations to "Introduction to informetrics" book                                                                                          | Unique citations                                                                                          | 109   | 46    |   | 8     |   |   |   |   |   |    |    |    |    |    |    |    |    |    |  |
|                                                  |                                                                                                                                           | (%)                                                                                                       | 27.46 | 11.59 |   | 2.20  |   |   |   |   |   |    |    |    |    |    |    |    |    |    |  |
|                                                  |                                                                                                                                           | GS and WoS= 24 (6.05 %); GS and SCO= 21 (5.29%); SCO and WoS=36 (9.7%); GS and SCO and WoS = 153 (38.54%) |       |       |   |       |   |   |   |   |   |    |    |    |    |    |    |    |    |    |  |

| AUTHORS                                               | SAMPLE                                                                  | UNIT                                                                                                        | 1       | 2      | 3 | 4      | 5 | 6 | 7 | 8 | 9 | 10 | 11 | 12 | 13    | 14     | 15     | 16 | 17 | 18 |  |
|-------------------------------------------------------|-------------------------------------------------------------------------|-------------------------------------------------------------------------------------------------------------|---------|--------|---|--------|---|---|---|---|---|----|----|----|-------|--------|--------|----|----|----|--|
| <b>JACIMOVIĆ &amp; PETROVIĆ &amp; ŽIVKOVIĆ (2010)</b> | Number of cited articles from SDJ                                       | Unique citations                                                                                            | 144     | 4      |   | 9      |   |   |   |   |   |    |    |    |       |        |        |    |    |    |  |
|                                                       |                                                                         | (%)                                                                                                         | 57.84   | 1.61   |   | 3.61   |   |   |   |   |   |    |    |    |       |        |        |    |    |    |  |
|                                                       |                                                                         | GS and WoS= 2 (0.80 %); GS and SCO = 6 (2.41%); SCO and WoS = 37 (14.86%); GS and SCO and WoS = 37 (14.86%) |         |        |   |        |   |   |   |   |   |    |    |    |       |        |        |    |    |    |  |
| <b>MINGERS &amp; LIPITAKIS (2010)</b>                 | Publications from 3 UK Business Schools. (n=4,600)                      | Publications                                                                                                | 3,023   | 1,004  |   |        |   |   |   |   |   |    |    |    |       |        |        |    |    |    |  |
|                                                       |                                                                         | (%)                                                                                                         | 65.72   | 21.83  |   |        |   |   |   |   |   |    |    |    |       |        |        |    |    |    |  |
| <b>ŠEMBER &amp; UTROBIČIĆ &amp; PETRAK (2010)</b>     | Croatian medical journal indexed articles (2005- 2006)                  | Unique citations                                                                                            | 86      | 12     |   | 39     |   |   |   |   |   |    |    |    |       |        |        |    |    |    |  |
|                                                       |                                                                         | (%)                                                                                                         | 22      | 3      |   | 10     |   |   |   |   |   |    |    |    |       |        |        |    |    |    |  |
|                                                       |                                                                         | GS and WoS= 9 (2 %); GS and SCO = 36 (9 %); SCO and WoS = 47 (12%); GS and SCO and WoS = 166 (42%)          |         |        |   |        |   |   |   |   |   |    |    |    |       |        |        |    |    |    |  |
| <b>BORNMANN et al (2009)</b>                          | Papers published (n=1,837) by the journal AngewandteChemie              | Publications                                                                                                | 1,747   |        |   | 1,827  |   |   |   |   |   |    |    |    | 1,837 | 1,837  |        |    |    |    |  |
|                                                       |                                                                         | (%)                                                                                                         | 95.1    |        |   | 99.5   |   |   |   |   |   |    |    |    |       | 100    | 100    |    |    |    |  |
|                                                       |                                                                         | Citations                                                                                                   | 9,320   |        |   | 44,601 |   |   |   |   |   |    |    |    |       | 44,502 | 48,160 |    |    |    |  |
| <b>FRANCESCHET (2009)</b>                             | Publications and cites of computer scientist group                      | Publications                                                                                                | 1,776   | 324    |   |        |   |   |   |   |   |    |    |    |       |        |        |    |    |    |  |
|                                                       |                                                                         | (%)                                                                                                         | 84.57   | 15.43  |   |        |   |   |   |   |   |    |    |    |       |        |        |    |    |    |  |
|                                                       |                                                                         | Citations                                                                                                   | 10,690  | 1,378  |   |        |   |   |   |   |   |    |    |    |       |        |        |    |    |    |  |
| <b>JACOBS (2009)</b>                                  | Comparison of citation counts for 30 Top articles in Gender & Society   | Citations                                                                                                   | 8,047   | 3,667  |   |        |   |   |   |   |   |    |    |    |       |        |        |    |    |    |  |
| <b>KULKARNI et al (2009)</b>                          | Cohort study of 328 articles published                                  | Citations                                                                                                   | 83,538  | 68,088 |   | 82,076 |   |   |   |   |   |    |    |    |       |        |        |    |    |    |  |
| <b>MARTELL (2009)</b>                                 | Title search, citations and average citations per article (n=217)       | Citations                                                                                                   | 1,394   | 680    |   |        |   |   |   |   |   |    |    |    |       |        |        |    |    |    |  |
|                                                       |                                                                         | Average citations per article                                                                               | 6.4     | 3.1    |   |        |   |   |   |   |   |    |    |    |       |        |        |    |    |    |  |
| <b>MIKKI (2009)</b>                                   | GS is compared with WoS for earth science authors (n=29)                | Publications                                                                                                | 5,048   | 1,573  |   |        |   |   |   |   |   |    |    |    |       |        |        |    |    |    |  |
|                                                       |                                                                         | (%)                                                                                                         | 76.25   | 23.76  |   |        |   |   |   |   |   |    |    |    |       |        |        |    |    |    |  |
|                                                       |                                                                         | Citations                                                                                                   | 40,908  | 43,028 |   |        |   |   |   |   |   |    |    |    |       |        |        |    |    |    |  |
|                                                       |                                                                         | Average h-index                                                                                             | 16.0    | 16.7   |   |        |   |   |   |   |   |    |    |    |       |        |        |    |    |    |  |
| <b>MOSKOVKIN (2009)</b>                               | Publications of the 10 largest universities (2008)                      | Publications                                                                                                | 565,709 | 55,581 |   |        |   |   |   |   |   |    |    |    |       |        |        |    |    |    |  |
|                                                       |                                                                         | (%)                                                                                                         | 91.06   | 8.94   |   |        |   |   |   |   |   |    |    |    |       |        |        |    |    |    |  |
| <b>ONYANCHA &amp; OCHOLLA &amp; (2009)</b>            | Comparison of 10 purposefully selected LIS researchers in South Africa  | Publications                                                                                                | 384     | 182    |   | 96     |   |   |   |   |   |    |    |    |       |        |        |    |    |    |  |
|                                                       |                                                                         | (%)                                                                                                         | 58      | 27.50  |   | 14.50  |   |   |   |   |   |    |    |    |       |        |        |    |    |    |  |
|                                                       |                                                                         | Citations                                                                                                   | 887     | 125    |   | 190    |   |   |   |   |   |    |    |    |       |        |        |    |    |    |  |
|                                                       |                                                                         | Average H-index                                                                                             | 5       | 1.7    |   | 2.3    |   |   |   |   |   |    |    |    |       |        |        |    |    |    |  |
| <b>HARZING &amp; VAN DER WAL (2008)</b>               | Comparison between WoS and GS for the impact of books between 1991-2001 | Citations                                                                                                   | 883     | 346    |   |        |   |   |   |   |   |    |    |    |       |        |        |    |    |    |  |
|                                                       |                                                                         | GS reports 2.5 times as many citations as WoS.                                                              |         |        |   |        |   |   |   |   |   |    |    |    |       |        |        |    |    |    |  |

| AUTHORS                                 | SAMPLE                                                                                                     | UNIT                                                                                             | 1                                                                                                                                                                                                                                    | 2      | 3 | 4      | 5 | 6 | 7 | 8 | 9 | 10 | 11 | 12    | 13    | 14 | 15 | 16 | 17 | 18 |  |
|-----------------------------------------|------------------------------------------------------------------------------------------------------------|--------------------------------------------------------------------------------------------------|--------------------------------------------------------------------------------------------------------------------------------------------------------------------------------------------------------------------------------------|--------|---|--------|---|---|---|---|---|----|----|-------|-------|----|----|----|----|----|--|
| <b>KOUSHA &amp; THELWALL (2008)</b>     | A sample of 882 articles from 39 open access ISI-indexed journals in 2001                                  | Citations                                                                                        | 5,589                                                                                                                                                                                                                                | 4,184  |   |        |   |   |   |   |   |    |    |       |       |    |    |    |    |    |  |
|                                         |                                                                                                            | Unique citations                                                                                 | 3,202                                                                                                                                                                                                                                | 1,797  |   |        |   |   |   |   |   |    |    |       |       |    |    |    |    |    |  |
|                                         |                                                                                                            | ISI citations overlapping with Google Scholar = 2,387                                            |                                                                                                                                                                                                                                      |        |   |        |   |   |   |   |   |    |    |       |       |    |    |    |    |    |  |
| <b>BAR-ILAN (2007)</b>                  | Compares the h-index of highly-cited Israeli researchers                                                   | Average H-index                                                                                  | 17.55                                                                                                                                                                                                                                | 17.3   |   | 17.1   |   |   |   |   |   |    |    |       |       |    |    |    |    |    |  |
|                                         |                                                                                                            | Average citations                                                                                | 245.64                                                                                                                                                                                                                               | 162.85 |   | 170.27 |   |   |   |   |   |    |    |       |       |    |    |    |    |    |  |
| <b>MEHO &amp; YANG (2007)</b>           | Citations to 25 library and information science (LIS) faculty members (n=5,285)                            | Distribution of unique and overlapping citations                                                 | GS =2,552 (48.3%); SCO AND WoS=1,104 (20.9%); GS, SCO AND WoS=1,629 (30.8%); GS identifies 1,448 (53.0%) more citations than WoS and Scopus together (4,181 citations for GS in comparison to 2,733 for the union of WoS and Scopus) |        |   |        |   |   |   |   |   |    |    |       |       |    |    |    |    |    |  |
| <b>BAKKALBASI et al (2006)</b>          | 11 journal titles from each discipline (oncology) using the JCR. All articles (n=614) published 1993- 2003 | Unique Citations                                                                                 | 78                                                                                                                                                                                                                                   | 41     |   | 74     |   |   |   |   |   |    |    |       |       |    |    |    |    |    |  |
|                                         |                                                                                                            | (%)                                                                                              | 13                                                                                                                                                                                                                                   | 7      |   | 12     |   |   |   |   |   |    |    |       |       |    |    |    |    |    |  |
|                                         |                                                                                                            | GS AND WoS = 26 (4%); GS AND SCO = 31 (5%); WoS AND SCO = 175 (28%); GS, WoS AND SCO = 189 (31%) |                                                                                                                                                                                                                                      |        |   |        |   |   |   |   |   |    |    |       |       |    |    |    |    |    |  |
| <b>BAKKALBASI et al (2006)</b>          | 11 journal titles (condensed matter physics) using the JCR. All articles(n=296) published 1993-2003        | Unique citations                                                                                 | 50                                                                                                                                                                                                                                   | 63     |   | 25     |   |   |   |   |   |    |    |       |       |    |    |    |    |    |  |
|                                         |                                                                                                            | (%)                                                                                              | 17                                                                                                                                                                                                                                   | 20     |   | 8      |   |   |   |   |   |    |    |       |       |    |    |    |    |    |  |
|                                         |                                                                                                            | GS AND WoS = 21 (9%); GS AND SCO = 9 (3%); WoS AND SCO = 65 (22%); GS, WoS AND SCO = 63 (21%)    |                                                                                                                                                                                                                                      |        |   |        |   |   |   |   |   |    |    |       |       |    |    |    |    |    |  |
| <b>SALISBURY &amp; TEKA WADE (2006)</b> | Journal coverage for Agricultural Economics and AgriBusiness (2004-2005)                                   | No. of Titles                                                                                    | 184                                                                                                                                                                                                                                  |        |   |        |   |   |   |   |   |    | 92 | 133   |       |    |    |    |    |    |  |
|                                         |                                                                                                            | Average year                                                                                     | 92                                                                                                                                                                                                                                   |        |   |        |   |   |   |   |   |    |    | 46    | 66.5  |    |    |    |    |    |  |
|                                         |                                                                                                            | % (n=108)                                                                                        | 85.19                                                                                                                                                                                                                                |        |   |        |   |   |   |   |   |    |    | 42.59 | 61.57 |    |    |    |    |    |  |
|                                         |                                                                                                            | Citations (%)                                                                                    | 39                                                                                                                                                                                                                                   |        |   |        |   |   |   |   |   |    |    | 17    | 44    |    |    |    |    |    |  |
| <b>YANG &amp; MEHO (2006)</b>           | Items published by two Library and Information Science full-time faculty members.                          | Unique citations                                                                                 | 38                                                                                                                                                                                                                                   | 89     |   | 25     |   |   |   |   |   |    |    |       |       |    |    |    |    |    |  |
|                                         |                                                                                                            | (%)                                                                                              | 9.9                                                                                                                                                                                                                                  | 23.1   |   | 6.5    |   |   |   |   |   |    |    |       |       |    |    |    |    |    |  |
| <b>JACSO (2005b)</b>                    | Citations count for the papers published in 22 volumes of APJAI (n=698)                                    | Documents                                                                                        | 680                                                                                                                                                                                                                                  | 675    |   |        |   |   |   |   |   |    |    |       |       |    |    |    |    |    |  |
|                                         |                                                                                                            | (%)                                                                                              | 97.42                                                                                                                                                                                                                                | 96.60  |   |        |   |   |   |   |   |    |    |       |       |    |    |    |    |    |  |
|                                         |                                                                                                            | Citations                                                                                        | 595                                                                                                                                                                                                                                  | 1,355  |   |        |   |   |   |   |   |    |    |       |       |    |    |    |    |    |  |
| <b>NORUZI (2005)</b>                    | Citation counts from Google Scholar and Web of Science (WoS) for Almind & Ingwersen                        | Citations                                                                                        | 98                                                                                                                                                                                                                                   | 81     |   |        |   |   |   |   |   |    |    |       |       |    |    |    |    |    |  |
|                                         |                                                                                                            | Unique citations                                                                                 | 64                                                                                                                                                                                                                                   | 47     |   |        |   |   |   |   |   |    |    |       |       |    |    |    |    |    |  |
|                                         |                                                                                                            | Citations GS AND WoS = 34                                                                        |                                                                                                                                                                                                                                      |        |   |        |   |   |   |   |   |    |    |       |       |    |    |    |    |    |  |
| <b>NORUZI (2005)</b>                    | Average cites of the most-cited 36 Authors in the field of Webometrics on GS and WoS                       | Citations                                                                                        | 1,110                                                                                                                                                                                                                                | 729    |   |        |   |   |   |   |   |    |    |       |       |    |    |    |    |    |  |
|                                         |                                                                                                            | Average citations                                                                                | 30.84                                                                                                                                                                                                                                | 20.25  |   |        |   |   |   |   |   |    |    |       |       |    |    |    |    |    |  |

**ACRONYMS:**

| COLUMN | ACRONYM    | DATABASE                                                          | COLUMN | ACRONYM | DATABASE                                                 |
|--------|------------|-------------------------------------------------------------------|--------|---------|----------------------------------------------------------|
| 1      | GS/GSM/GSC | Google Scholar / Google Scholar Metrics/ Google Scholar Citations | 10     | JCR     | Journal Citation Reports                                 |
| 2      | WoS        | Web of Science                                                    | 11     | ECON    | Econlit                                                  |
| 3      | MAS        | Microsoft Academic Search                                         | 12     | CAB     | CAB ABSTRACTS                                            |
| 4      | SCO        | Scopus                                                            | 13     | SCI     | Science Citation Index                                   |
| 5      | PUB        | Pubmed                                                            | 14     | CA      | Chemical Abstracts                                       |
| 6      | PSY        | PsycINFO                                                          | 15     | GB      | Google Books                                             |
| 7      | ERIC       | Education Resources Information Center                            | 16     | KoMCI   | Korean Medical Citation Index                            |
| 8      | SSCI       | Social Sciences Citation Index                                    | 17     | KMS     | KoreaMed Synapse                                         |
| 9      | SJR        | SCImago Journal Rank                                              | 18     | CINAHL  | Cumulative Index to Nursing and Allied Health Literature |

**APPENDIX II. EMPIRICAL STUDIES ABOUT GOOGLE SCHOLAR ACCORDING TO UNIT OF ANALYSIS AND DOCUMENT TYPE**

| AUTHORS                                         | SAMPLE                                                                                                                  | TYPE ANALYSIS<br>GS | UNIT                                             | GS/GSM/GSC | %     | WoS   | %     | SCO   | %    |
|-------------------------------------------------|-------------------------------------------------------------------------------------------------------------------------|---------------------|--------------------------------------------------|------------|-------|-------|-------|-------|------|
| <b>WINTER, &amp; ZADPOOR &amp; DODOU (2014)</b> | Number of citations on 5th April 2013 to Garfield (1955) for WoS and GS as a function of document type                  | Citations           | Journals                                         | 805        | 69.6  | 546   | 90.1  |       |      |
|                                                 |                                                                                                                         |                     | Conferences                                      | 123        | 10.6  | 53    | 8.7   |       |      |
|                                                 |                                                                                                                         |                     | Books or book chapters                           | 63         | 5.4   | 7     | 1.2   |       |      |
|                                                 |                                                                                                                         |                     | Theses                                           | 75         | 6.5   | 0     | 0     |       |      |
|                                                 |                                                                                                                         |                     | Reports                                          | 13         | 1.1   | 0     | 0     |       |      |
|                                                 |                                                                                                                         |                     | Other                                            | 43         | 3.7   | 0     | 0     |       |      |
|                                                 |                                                                                                                         |                     | Unknown                                          | 34         | 2.9   | 0     | 0     |       |      |
|                                                 |                                                                                                                         |                     | Duplicates                                       | 64         | -     | 0     | 0     |       |      |
|                                                 |                                                                                                                         |                     | False positives                                  | 11         | -     | 1     | -     |       |      |
|                                                 |                                                                                                                         |                     | All types (incl. duplicates and false positives) | 1,231      |       | 607   |       |       |      |
| <b>MIRI &amp; RAOOFI &amp; HEIDARI (2012)</b>   | Comparison of Number of Citations in ISI, GS, and SC based on Article Types published in Hepatitis Monthly (2008, 2009) | Citations           | Original Article                                 | 39         |       | 30    |       | 40    |      |
|                                                 |                                                                                                                         |                     | Review Article                                   | 28         |       | 25    |       | 25    |      |
|                                                 |                                                                                                                         |                     | Brief Report                                     | 9          |       | 8     |       | 10    |      |
|                                                 |                                                                                                                         |                     | Editorial                                        | 8          |       | 4     |       | 7     |      |
|                                                 |                                                                                                                         |                     | Case Report                                      | 3          |       | 3     |       | 3     |      |
|                                                 |                                                                                                                         |                     | Letter to the Editor                             | -          |       | 1     |       | 1     |      |
|                                                 |                                                                                                                         |                     | Guidelines and Clinical Algorithm                | -          |       |       |       |       |      |
| <b>LASDA BERGMAN (2012)</b>                     | Source types of citing references                                                                                       | Citations           | Article                                          | 1,951      | 59.6  | 1,735 | 99.7  | 1,782 | 83.8 |
|                                                 |                                                                                                                         |                     | Book                                             | 318        | 9.7   |       |       | 1     | 0.0  |
|                                                 |                                                                                                                         |                     | Conference Paper                                 | 32         | 1.0   |       |       | 25    | 1.2  |
|                                                 |                                                                                                                         |                     | Foreign Language                                 | 281        | 8.6   |       |       |       |      |
|                                                 |                                                                                                                         |                     | Government Document                              | 44         | 1.3   |       |       |       |      |
|                                                 |                                                                                                                         |                     | Dissertation                                     | 329        | 10.1  |       |       |       |      |
|                                                 |                                                                                                                         |                     | Master's Thesis                                  | 108        | 3.3   |       |       |       |      |
|                                                 |                                                                                                                         |                     | Bachelor's Thesis                                | 6          | 0.2   |       |       |       |      |
|                                                 |                                                                                                                         |                     | Report                                           | 84         | 2.6   |       |       |       |      |
|                                                 |                                                                                                                         |                     | Syllabus                                         | 5          | 0.2   |       |       |       |      |
|                                                 |                                                                                                                         |                     | Unpublished Manuscript                           | 44         | 1.3   |       |       |       |      |
|                                                 |                                                                                                                         |                     | Working Paper                                    | 35         | 1.1   |       |       |       |      |
|                                                 |                                                                                                                         |                     | Review                                           | 24         | 0.7   |       |       | 248   | 11.7 |
|                                                 |                                                                                                                         |                     | Presentation Slides                              | 3          | 0.1   |       |       |       |      |
|                                                 |                                                                                                                         |                     | Blog                                             | 3          | 0.1   |       |       |       |      |
|                                                 |                                                                                                                         |                     | Editorial                                        | 1          | 0.0   |       |       | 28    | 1.3  |
|                                                 |                                                                                                                         |                     | Letters to the Editor                            | 1          | 0.0   |       |       | 10    | 0.5  |
|                                                 |                                                                                                                         |                     | Supplementary Material                           | 1          | 0.0   |       |       |       |      |
|                                                 |                                                                                                                         |                     | Web Page                                         | 1          | 0.0   |       |       |       |      |
|                                                 |                                                                                                                         |                     | Guideline                                        | 1          | 0.0   |       |       |       |      |
|                                                 |                                                                                                                         |                     | Series                                           |            |       | 6     | 0.3   |       |      |
|                                                 |                                                                                                                         |                     | Short Survey                                     |            |       |       |       | 5     | 0.2  |
| Note                                            |                                                                                                                         |                     |                                                  |            | 27    | 1.3   |       |       |      |
| Total                                           |                                                                                                                         |                     | 3,272                                            | 100.0      | 1,741 | 100.0 | 2,126 | 100.0 |      |

| AUTHORS                             | SAMPLE                                                                                                                           | TYPE ANALYSIS<br>GS | UNIT                             | GS/GSM/GSC | %      | WoS   | %     | SCO   | %     |
|-------------------------------------|----------------------------------------------------------------------------------------------------------------------------------|---------------------|----------------------------------|------------|--------|-------|-------|-------|-------|
| <b>MEHO &amp; YANG (2007)</b>       | Citations to the work of 25 LIS faculty members Citation count by document type (1996–2005)                                      | Citations           | Journal articles                 | 2,215      | 40.32  | 1,529 | 75.6  | 1,754 | 76.2  |
|                                     |                                                                                                                                  |                     | Conference papers                | 1,849      | 33.66  | 229   | 11.3  | 359   | 15.6  |
|                                     |                                                                                                                                  |                     | Review articles                  | 86         | 1.57   | 172   | 8.5   | 147   | 6.4   |
|                                     |                                                                                                                                  |                     | Editorial materials              | 25         | 0.46   | 63    | 3.1   | 36    | 1.6   |
|                                     |                                                                                                                                  |                     | Book reviews                     | 3          | 0.05   | 17    | 0.8   | 0     | 0.0   |
|                                     |                                                                                                                                  |                     | Letters to the editor            | 2          | 0.04   | 9     | 0.4   | 2     | 0.1   |
|                                     |                                                                                                                                  |                     | Biographical item                | 1          | 0.02   | 2     | 0.1   | 1     | 0.0   |
|                                     |                                                                                                                                  |                     | Doctoral dissertations           | 261        | 4.75   |       |       |       |       |
|                                     |                                                                                                                                  |                     | Master's theses                  | 243        | 4.42   |       |       |       |       |
|                                     |                                                                                                                                  |                     | Book chapters                    | 199        | 3.62   |       |       |       |       |
|                                     |                                                                                                                                  |                     | Technical reports                | 129        | 2.35   |       |       |       |       |
|                                     |                                                                                                                                  |                     | Reports                          | 110        | 2.00   |       |       |       |       |
|                                     |                                                                                                                                  |                     | Books                            | 102        | 1.86   |       |       |       |       |
|                                     |                                                                                                                                  |                     | Conference presentations         | 72         | 1.31   |       |       |       |       |
|                                     |                                                                                                                                  |                     | Unpublished papers               | 65         | 1.18   |       |       |       |       |
|                                     |                                                                                                                                  |                     | Bachelor's theses                | 34         | 0.62   |       |       |       |       |
|                                     |                                                                                                                                  |                     | Working papers                   | 31         | 0.56   |       |       |       |       |
|                                     |                                                                                                                                  |                     | Research reports                 | 23         | 0.42   |       |       |       |       |
|                                     |                                                                                                                                  |                     | Workshop papers                  | 15         | 0.27   |       |       |       |       |
|                                     |                                                                                                                                  |                     | Doctoral dissertation proposals  | 9          | 0.16   |       |       |       |       |
|                                     |                                                                                                                                  |                     | Conference posters               | 9          | 0.16   |       |       |       |       |
|                                     |                                                                                                                                  |                     | Book reviews                     | 3          | 0.05   |       |       |       |       |
|                                     |                                                                                                                                  |                     | Master's thesis proposals        | 3          | 0.05   |       |       |       |       |
|                                     |                                                                                                                                  |                     | Preprints                        | 3          | 0.05   |       |       |       |       |
|                                     |                                                                                                                                  |                     | Conference paper proposals       | 2          | 0.04   |       |       |       |       |
|                                     |                                                                                                                                  |                     | Government documents             | 2          | 0.04   |       |       |       |       |
|                                     |                                                                                                                                  |                     | Total                            | 5,493      | 100.00 | 2,023 | 100.0 | 2,301 | 100.0 |
|                                     |                                                                                                                                  |                     | Total from journals              | 2,332      | 42.45  | 1,794 | 88.7  | 1,942 | 84.4  |
| Total from conference papers        | 1,849                                                                                                                            | 33.66               | 229                              | 11.3       | 359    | 15.6  |       |       |       |
| Total from journals and conferences | 4,181                                                                                                                            | 76.12               | 2,023                            | 100.0      | 2,301  | 100.0 |       |       |       |
| Total from dissertations/theses     | 538                                                                                                                              | 9.79                |                                  |            |        |       |       |       |       |
| Total from books                    | 301                                                                                                                              | 5.48                |                                  |            |        |       |       |       |       |
| Total from reports                  | 262                                                                                                                              | 4.77                |                                  |            |        |       |       |       |       |
| Total from other document types     | 211                                                                                                                              | 3.84                |                                  |            |        |       |       |       |       |
| <b>YANG &amp; MEHO (2006)</b>       | Breakdown of citations found in Google Scholar by document type by two library and information science full-time faculty members | Citations           | Journal Articles                 | 169        | 48,4   |       |       |       |       |
|                                     |                                                                                                                                  |                     | Conference Papers                | 90         | 25,8   |       |       |       |       |
|                                     |                                                                                                                                  |                     | Research reports                 | 39         | 11,2   |       |       |       |       |
|                                     |                                                                                                                                  |                     | Dissertations and Theses         | 15         | 4,3    |       |       |       |       |
|                                     |                                                                                                                                  |                     | Dead links                       | 7          | 2,0    |       |       |       |       |
|                                     |                                                                                                                                  |                     | Editorial Materials No access    | 6          | 1,7    |       |       |       |       |
|                                     |                                                                                                                                  |                     | Workshops                        | 5          | 1,4    |       |       |       |       |
|                                     |                                                                                                                                  |                     | No access                        | 4          | 1,1    |       |       |       |       |
|                                     |                                                                                                                                  |                     | Technical reports                | 3          | 0,9    |       |       |       |       |
|                                     |                                                                                                                                  |                     | Websites                         | 3          | 0,9    |       |       |       |       |
|                                     |                                                                                                                                  |                     | Other (chapters, bibliographies) | 8          | 2,3    |       |       |       |       |
|                                     |                                                                                                                                  |                     | Total                            | 349        | 100    |       |       |       |       |



| AUTHORS                                               | SAMPLE                                             | TYPE ANALYSIS GS | UNIT                          | GS/GSM/GSC | WoS      | SCO |
|-------------------------------------------------------|----------------------------------------------------|------------------|-------------------------------|------------|----------|-----|
| <b>JAĆIMOVIĆ &amp; PETROVIĆ &amp; ŽIVKOVIĆ (2010)</b> | SDJ citation was collected in September 2010       | Citations        | Article                       | 117        | 50       | 56  |
|                                                       |                                                    |                  | Review                        | 13         | 4        | 6   |
|                                                       |                                                    |                  | Editorial                     | 3          | 1        | 3   |
|                                                       |                                                    |                  | Proceedings                   | 3          | 2        | 3   |
|                                                       |                                                    |                  | Miscellaneous                 | 8          |          |     |
| <b>BAKKALBASI et al (2006)</b>                        | 11 journal titles from each discipline (1993-2003) | Citations        |                               | Oncology   | CM Phys  |     |
|                                                       |                                                    |                  | Journal                       | 31 (62 %)  | 18 (37%) |     |
|                                                       |                                                    |                  | Archive                       | 3 (6%)     | 12 (25%) |     |
|                                                       |                                                    |                  | College or University         | 9 (18%)    | 6 (13%)  |     |
|                                                       |                                                    |                  | Government                    | 3 (6%)     | 4 (8%)   |     |
|                                                       |                                                    |                  | Non-Governmental Organization | 2 (4%)     | 8 (17 %) |     |
|                                                       |                                                    |                  | Commercial                    | 0          | 0        |     |
|                                                       |                                                    |                  | Other                         | 2 (4%)     | 0        |     |
|                                                       |                                                    |                  | Total                         | 50         | 48       |     |

| AUTHORS                                | SAMPLE                                                                                | TYPE ANALYSIS GS | UNIT                          | GS/GSM/GSC | %     | WoS | % | SCO | % | CA  | %    |
|----------------------------------------|---------------------------------------------------------------------------------------|------------------|-------------------------------|------------|-------|-----|---|-----|---|-----|------|
| <b>BAR-ILAN (2010)</b>                 | Document types of the unique items retrieved by GS (n=109) were collected in 2008     | Documents        | Journals                      | 28         | 25.7% |     |   |     |   |     |      |
|                                        |                                                                                       |                  | Proceedings                   | 25         | 22.9% |     |   |     |   |     |      |
|                                        |                                                                                       |                  | Theses                        | 15         | 13.8% |     |   |     |   |     |      |
|                                        |                                                                                       |                  | Book chapters                 | 13         | 11.9% |     |   |     |   |     |      |
|                                        |                                                                                       |                  | Reports                       | 10         | 9.2%  |     |   |     |   |     |      |
|                                        |                                                                                       |                  | Manuscripts                   | 7          | 6.4%  |     |   |     |   |     |      |
|                                        |                                                                                       |                  | In Chinese                    | 4          | 3.7%  |     |   |     |   |     |      |
|                                        |                                                                                       |                  | Books                         | 3          | 2.8%  |     |   |     |   |     |      |
|                                        |                                                                                       |                  | Newsletters                   | 2          | 1.8%  |     |   |     |   |     |      |
|                                        |                                                                                       |                  | Encyclopedia entries          | 1          | 0.9%  |     |   |     |   |     |      |
| <b>LEVINE-CLARK &amp; KRAUS (2007)</b> | Compare GS and CA for finding Chemistry information in six different searches (n=702) | Documents        | Journal Articles (n=564)      | 482        | 85.5  |     |   |     |   | 521 | 92.4 |
|                                        |                                                                                       |                  | Patents (n=54)                | 4          | 7.4   |     |   |     |   | 24  | 100  |
|                                        |                                                                                       |                  | Problems (n=26)               | 26         | 100   |     |   |     |   | 0   | 0.0  |
|                                        |                                                                                       |                  | Conference proceedings (n=23) | 11         | 47.8  |     |   |     |   | 12  | 52.2 |
|                                        |                                                                                       |                  | Books (n=21)                  | 21         | 100   |     |   |     |   | 7   | 33.3 |
|                                        |                                                                                       |                  | Dissertations (n=9)           | 9          | 100   |     |   |     |   | 5   | 55.6 |
| Others (n= 5)                          | 5                                                                                     | 100              |                               |            |       |     | 2 | 40  |   |     |      |



**APPENDIX III. EMPIRICAL STUDIES ABOUT GOOGLE SCHOLAR ACCORDING TO INDICATOR MEASURED**

| AUTHORS                               | SAMPLE                                                                                                        | TYPE ANALYSIS GS    | PUBLICATION TYPES       | N     | % OF OUTPUTS | PUB GS | PUB WOS | % GS | % WOK | CITATIONS GS | CITATIONS WOS | GS CITATION/ PAPER | WOS CITATION/ PAPER |  |
|---------------------------------------|---------------------------------------------------------------------------------------------------------------|---------------------|-------------------------|-------|--------------|--------|---------|------|-------|--------------|---------------|--------------------|---------------------|--|
|                                       |                                                                                                               |                     |                         |       |              |        |         |      |       |              |               |                    |                     |  |
| <b>MINGERS &amp; LIPITAKIS (2010)</b> | GS and WoS citations by publication type<br><br>Number of publications from 3 UK Business Schools (n = 4,600) | Citations/ Document | Total books             | 95    | 2.1          | 70     |         |      |       | 2,257        |               | 32.24              |                     |  |
|                                       |                                                                                                               |                     | Total edited books      | 76    | 1.7          | 58     |         |      |       | 1,763        |               | 30.40              |                     |  |
|                                       |                                                                                                               |                     | Total book chapters     | 619   | 13.4         | 287    |         |      |       | 1,946        |               | 6.78               |                     |  |
|                                       |                                                                                                               |                     | Total journal articles  | 2,109 | 45.8         | 1,882  | 1,004   |      |       | 27,606       | 8,434         | 14.67              |                     |  |
|                                       |                                                                                                               |                     | Total conference papers | 1,013 | 22.0         | 340    |         |      |       | 848          |               | 2.49               |                     |  |
|                                       |                                                                                                               |                     | Total working           |       |              |        |         |      |       |              |               |                    |                     |  |
|                                       |                                                                                                               |                     | Total reports           | 171   | 3.7          | 59     |         |      |       | 491          |               | 8.32               |                     |  |
|                                       |                                                                                                               |                     | Total others            | 110   | 2.4          | 41     |         |      |       | 133          |               | 3.24               |                     |  |
|                                       |                                                                                                               |                     | Total                   | 4,600 |              | 3,023  | 1,004   |      |       | 36,579       | 8,434         | 12.1               |                     |  |

| AUTHORS                                               | SAMPLE                                                          | TYPE ANALYSIS GS | PUBLICATION TYPES            | GS  |     | WoS |    | SCOPUS |    | TOTAL |     |
|-------------------------------------------------------|-----------------------------------------------------------------|------------------|------------------------------|-----|-----|-----|----|--------|----|-------|-----|
|                                                       |                                                                 |                  |                              | 1   | 2   | 1   | 2  | 1      | 2  | 1     | 2   |
| <b>JACIMOVIĆ &amp; PETROVIĆ &amp; ŽIVKOVIĆ (2010)</b> | Type of cited articles from SDJ was collected in September 2010 | Citations        | Informative articles         | 23  | 43  | 13  | 14 | 18     | 22 | 32    | 55  |
|                                                       |                                                                 |                  | Original scientific articles | 57  | 86  | 39  | 50 | 38     | 50 | 76    | 119 |
|                                                       |                                                                 |                  | Case reports                 | 5   | 5   | 2   | 3  | 2      | 3  | 5     | 6   |
|                                                       |                                                                 |                  | Proceedings                  | 20  | 31  | 7   | 7  | 5      | 5  | 26    | 37  |
|                                                       |                                                                 |                  | Reviews                      | 7   | 16  | 4   | 6  | 4      | 6  | 8     | 17  |
|                                                       |                                                                 |                  | Professional articles        | 3   | 6   | 4   | 5  | 5      | 7  | 8     | 12  |
|                                                       |                                                                 |                  | Preliminary communications   | 1   | 1   | 0   | 0  | 0      | 0  | 1     | 1   |
|                                                       |                                                                 |                  | Articles from praxis         | 0   | 0   | 0   | 0  | 1      | 1  | 1     | 1   |
|                                                       |                                                                 |                  | Book reviews                 | 1   | 1   | 0   | 0  | 0      | 0  | 1     | 1   |
|                                                       |                                                                 |                  | Total                        | 117 | 189 | 69  | 85 | 73     | 94 | 158   | 249 |

1: Number of cited; 2: Number of received citations



| AUTHORS                                                     | SAMPLE                                                                                                 | UNIT GS   | LANGUAGE    | GS/GSM/GSC | %     | WoS | %     | SCO   | %     |
|-------------------------------------------------------------|--------------------------------------------------------------------------------------------------------|-----------|-------------|------------|-------|-----|-------|-------|-------|
| <b>MEHO &amp; YANG (2007)</b>                               | Citations to the work of 25 LIS faculty members. Citation count distribution by language (1996 – 2005) | Citations | English     | 3,891      | 93.06 | 2   | 98.86 | 2,285 | 99.30 |
|                                                             |                                                                                                        |           | Portuguese  | 92         | 2.20  |     |       |       |       |
|                                                             |                                                                                                        |           | Spanish     | 63         | 1.51  | 4   | 0.20  | 3     | 0.13  |
|                                                             |                                                                                                        |           | German      | 38         | 0.91  | 13  | 0.64  | 9     | 0.39  |
|                                                             |                                                                                                        |           | Chinese     | 44         | 1.05  |     |       |       |       |
|                                                             |                                                                                                        |           | French      | 32         | 0.77  |     |       |       |       |
|                                                             |                                                                                                        |           | Italian     | 8          | 0.19  | 3   | 0.15  | 1     | 0.04  |
|                                                             |                                                                                                        |           | Japanese    | 1          | 0.02  |     |       |       |       |
|                                                             |                                                                                                        |           | Swedish     | 3          | 0.07  | 3   | 0.15  | 3     | 0.13  |
|                                                             |                                                                                                        |           | Czech       | 2          | 0.05  |     |       |       |       |
|                                                             |                                                                                                        |           | Dutch       | 2          | 0.05  |     |       |       |       |
|                                                             |                                                                                                        |           | Finnish     | 2          | 0.05  |     |       |       |       |
|                                                             |                                                                                                        |           | Croatian    | 1          | 0.02  |     |       |       |       |
|                                                             |                                                                                                        |           | Hungarian   | 1          | 0.02  |     |       |       |       |
|                                                             |                                                                                                        |           | Polish      | 1          | 0.02  |     |       |       |       |
|                                                             |                                                                                                        |           | Non-English | 290        | 6.94  | 23  | 1.14  | 16    | 0.70  |
| Total                                                       | 4,181                                                                                                  | 100       | 2,023       | 100        | 2,301 | 100 |       |       |       |
| <b>NEUHAUS &amp; NEUHAUS &amp; ASHER &amp; WREDE (2006)</b> | Contents of 47 different databases with that of Google Scholar (April-July, 2005)                      | Documents | English     |            | 68    |     |       |       |       |
|                                                             |                                                                                                        |           | Non-English |            | 12    |     |       |       |       |

## APPENDIX V. ABSURD QUERIES ON GOOGLE SCHOLAR

### *Server error with an absurd query on Google Scholar:*



The screenshot shows a Google search interface with the query "a -site:ssstfsffsdffasdfs.com" in the search bar. Below the search bar, the text "Server Error" is displayed in bold. Underneath, a message reads: "We're sorry but it appears that there has been an internal server error while processing your request. Our engineers have been notified and are working to resolve the issue. Please try again later."

### *Absurd query on Google Scholar: excluding patents and citations*



The screenshot shows a Google Scholar search interface with the query "1 -site:ssstfsffsdffasdfs.com" in the search bar. Below the search bar, the text "Scholar" is displayed in red. Underneath, the text "About 127,000,000 results (10.99 sec)" is shown.

### *Absurd query on Google Scholar: excluding patents*



The screenshot shows a Google Scholar search interface with the query "1 -site:ssstfsffsdffasdfs.com" in the search bar. Below the search bar, the text "Scholar" is displayed in red. Underneath, the text "About 158,000,000 results (13.66 sec)" is shown.

### *Absurd query on Google Scholar: including articles, citations and patents*



The screenshot shows a Google Scholar search interface with the query "1 -site:ssstfsffsdffasdfs.com" in the search bar. Below the search bar, the text "Scholar" is displayed in red. Underneath, the text "About 170,000,000 results (26.87 sec)" is shown.

### *Hit count estimates inconsistencies in the activation / deactivation of citations*



The screenshot shows a Google Scholar search interface with the query "1 -site:ssstfsffsdffasdfs.com" in the search bar. Below the search bar, the text "Scholar" is displayed in red. Underneath, the text "About 39 results (0.04 sec)" is shown.



The screenshot shows the search results for the query "1 -site:ssstfsffsdffasdfs.com". On the left side, there is a sidebar with filters: "Articles", "Case law", "Federal courts", "California courts", "Select courts...", and "My library". Below these filters, there are options for "Any time", "Since 2014", "Since 2013", "Since 2010", and "Custom range...". The "Custom range..." option is selected, and the date range is set to "1840" — "1840".

The main content area displays two search results:

- Evans v. Gee**  
39 US 1, 10 L. Ed. 327 - Supreme Court, 1840 - Google Scholar  
Nothing appears in the record showing that Thomas Evans was dead, save an affidavit of one of his sons; and the circumstances that the administrator's name is used in prosecuting the writ of error: but no suggestion of the death of Thomas Evans, nor any revival of the judgment ...  
Cited by 49 How cited Related articles All 3 versions Cite Save
- THE UNITED STATES v. GRATIOT ET AL.**  
39 US 526, 10 L. Ed. 573 - Supreme Court, 1840 - Google Scholar  
... "1. All purchases or other acquisitions of ore, ashes, zinc, or lead, to be from persons authoriz to work the mines, either as lessees, smelters, or diggers, and from no others; and no ore to be purchased from the leased premises of any person without his permission. ...  
Cited by 892 How cited Related articles All 3 versions Cite Save

Below the second result, there is another entry:

- Philadelphia & Trenton R. Co. v. Stimpson**  
39 US 448, 10 L. Ed. 535 - Supreme Court, 1840 - Google Scholar  
... of the plaintiff's right in the alleged invention, but a mere compromise of a pending suit, disconnected with a grant, in writing, made by the plaintiff to the said company; and to that end proposed to put the following questions, respectively, and in order, to the witness: "1. Do you ...  
Cited by 555 How cited Related articles All 3 versions Cite Save

*Citations deactivated.*

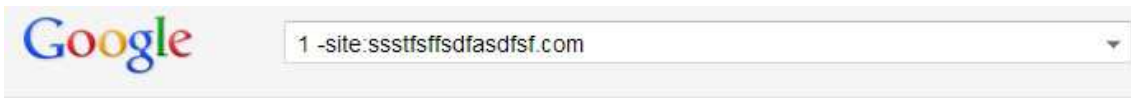

Scholar

About 7 results (0.07 sec)

Articles

Case law

Federal courts

California courts

Select courts...

My library

Any time

Since 2014

Since 2013

Since 2010

Custom range...

1840

—

1840

Evans v. Gee

39 US 1, 10 L. Ed. 327 - Supreme Court, 1840 - Google Scholar

Nothing appears in the record showing that Thomas Evans was dead, save an affidavit of one of his sons, and the circumstances that the administrator's name is used in prosecuting the writ of error: but no suggestion of the death of Thomas Evans, nor any revival of the judgment ...

Cited by 49 How cited Related articles All 3 versions Cite Save

THE UNITED STATES v. GRATIOT ET AL.

39 US 526, 10 L. Ed. 573 - Supreme Court, 1840 - Google Scholar

... "1. All purchases or other acquisitions of ore, ashes, zinc, or lead, to be from persons authorized to work the mines, either as lessees, smelters, or diggers, and from no others; and no ore to be purchased from the leased premises of any person without his permission. ...

Cited by 892 How cited Related articles All 3 versions Cite Save

Create alert

[About Google Scholar](#)

[All About Google](#)

[Privacy & Terms](#)

[Give us feedback](#)

Citations activated.

**Empty and false SERPs in Google Scholar**

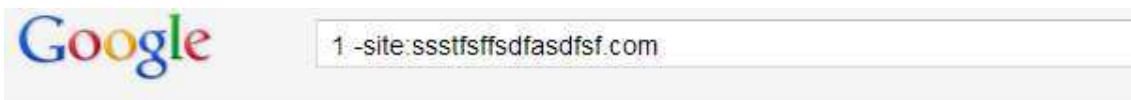

Scholar

Page 6 of about 132 results (0.09 sec)

Articles

Create alert

Case law

Federal courts

California courts

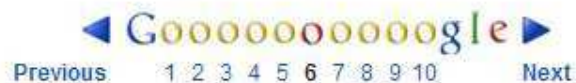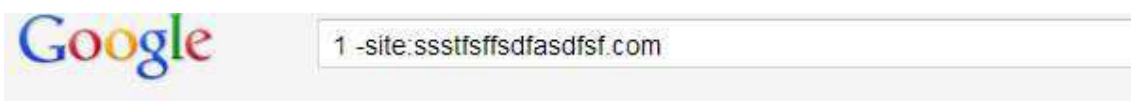

Scholar

Page 15 of about 521 results (0.12 sec)

Articles

Create alert

Case law

Federal courts

California courts

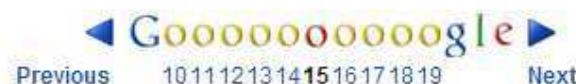

Source of all images: Google Scholar

## References

- Abdullah, A., & Thelwall, M. (in press). Can the Impact of non-Western Academic Books be Measured? An investigation of Google Books and Google Scholar for Malaysia. *Journal of the Association for Information Science and Technology*.
- Adriaanse, L.S., & Rensleigh, C. (2011). Comparing Web of Science, Scopus and Google Scholar from an Environmental Sciences perspective. *South African Journal of Library Information Science*, 77(2), 169–178.
- Amara, N. & Landry, R. (2012). Counting citations in the field of business and management: why use Google Scholar rather than the Web of Science. *Scientometrics*, 93(3), 553–581.
- Bakkalbasi, N., Bauer, K., Glover, J. & Wang, L. (2006). Three options for citation tracking: Google Scholar, Scopus and Web of Science. *Biomedical digital libraries*, 3(1), 7.
- Bar-Ilan, J. (2007). Which h-index? — A comparison of WoS, Scopus and Google Scholar. *Scientometrics*, 74(2), 257–271.
- Bar-Ilan, J. (2010). Citations to the “Introduction to informetrics” indexed by WOS, Scopus and Google Scholar. *Scientometrics*, 82(3), 495–506.
- Bornmann, L., Marx, W., Schier, H., Rahm, E., Thor, A., & Daniel, H. D. (2009). Convergent validity of bibliometric Google Scholar data in the field of chemistry—Citation counts for papers that were accepted by *Angewandte Chemie International Edition* or rejected but published elsewhere, using Google Scholar, Science Citation Index, Sc.. *Journal of Informetrics*, 3(1), 27–35.
- Cabezas-Clavijo, A. & Delgado López-Cózar, E. (2013). Google Scholar and the h-index in biomedicine: the popularization of bibliometric assessment. *Medicina intensiva*, 37(5), 343–354.
- Cardenas, J. & Udo, G.J. (2013). Knowledge Management Literature Trends: an ISI Web of Science and Google Scholar comparison. *Proceedings of the 44th Annual Meeting of the Decision Sciences Institute*. Baltimore, November 16-19.
- De Groote, S.L. & Raszewski, R. (2012). Coverage of Google Scholar, Scopus, and Web of Science: A case study of the h-index in nursing. *Nursing Outlook*, 60(6), 391–400.
- Delgado López-Cózar, E. & Repiso, R. (2013). The Impact of Scientific Journals of Communication: Comparing Google Scholar Metrics, Web of Science and Scopus. *Comunicar*, 41, 45-52.
- Franceschet, M. (2009). A comparison of bibliometric indicators for computer science scholars and journals on Web of Science and Google Scholar. *Scientometrics*, 83(1), 243–258.
- Gil Roales-Nieto, J. & O’Neill, B. (2012). A Comparative Study of Journals Quality based on Web of Science, Scopus and Google Scholar: A Case Study with IJP & PT. *International Journal of Psychology and Psychological Therapy*, 12(3), 453–479.
- Haley, M.R. (2014). Ranking top economics and finance journals using Microsoft Academic Search versus Google Scholar: How does the new publish or perish option compare?. *Journal of the Association for Information Science and Technology*, 65(5), 1079–1084.
- Harzing, A.W. & Van der Wal, R. (2009). A Google Scholar h-index for journals: An alternative metric to measure journal impact in economics and business. *Journal of the American Society for Information Science and Technology*, 60(1), 41-46.
- Huh, S. (2013). Citation Analysis of the Korean Journal of Urology From Web of Science, Scopus, Korean Medical Citation Index, KoreaMed Synapse, and Google Scholar. *Korean journal of urology*, 54(4), 220–228.
- Jaćimović, J., Petrović, R., & Živković, S. (2010). A citation analysis of Serbian Dental Journal using Web of Science, Scopus and Google Scholar. *Stomatoloski glasnik Srbije*, 57(4), 201-211.
- Jacobs, J.A. (2009). Where Credit Is Due: Assessing the Visibility of Articles Published in *Gender & Society* with Google Scholar. *Gender & Society*, 23(6), 817–832.
- Jacsó, P. (2005). Comparison and analysis of the citedness scores in Web of Science and Google Scholar. *Digital libraries: Implementing strategies and sharing experiences* (pp. 360-369). Springer Berlin Heidelberg



- Khabsa, M. & Giles, C.L. (2014). The Number of Scholarly Documents on the Public Web. *Plos One*, 9(5), e93949.
- Kousha, K. & Thelwall, M. (2008). Sources of Google Scholar Citations outside the Science Citation Index: A comparison between four science disciplines. *Scientometrics*, 74(2), 273–294.
- Kousha, K., Thelwall, M. & Rezaie, S. (2011). Assessing the citation impact of books: The role of Google Books, Google Scholar, and Scopus. *Journal of the American Society for Information Science*, 62(11), 2147–2164.
- Kulkarni, A.V., Aziz, B., Shams, I., & Busse, J.W. (2009). Comparisons of citations in Web of Science, Scopus, and Google Scholar for articles published in general medical journals. *Jama*, 302(10), 1092-1096.
- Lasda Bergman, E.M. (2012). Finding Citations to Social Work Literature: The Relative Benefits of Using Web of Science, Scopus, or Google Scholar. *Journal of Academic Librarianship*, 38(6), 370–379.
- Levine-Clark, M. & Kraus, J. (2007). Finding Chemistry Information Using Google Scholar : A Comparison with Chemical Abstracts Service. *Science Technology Libraries*, 27(4), 3–17.
- Martell, C. (2009). A Citation Analysis of College & Research Libraries Comparing Yahoo, Google, Google Scholar, and ISI Web of Knowledge with Implications for Promotion and Tenure. *College Research Libraries*, 70(5), 460–472.
- Meho, L.I. & Yang, K. (2007). Impact of data sources on citation counts and rankings of LIS faculty: Web of Science versus Scopus and Google Scholar. *Journal of the American Society for Information Science and Technology*, 58(13), 2105–2125.
- Meier, J.J. & Conkling, T.W. (2008). Google Scholar's Coverage of the Engineering Literature: An Empirical Study. *The Journal of Academic Librarianship*, 34(3), 196–201.
- Mikki, S. (2009). Comparing Google Scholar and ISI Web of Science for Earth Sciences. *Scientometrics*, 82(2), 321–331.
- Mingers, J. & Lipitakis, E.A.E.C.G. (2010). Counting the citations: a comparison of Web of Science and Google Scholar in the field of business and management. *Scientometrics*, 85(2), 613–625.
- Miri, S.M., Raoofi, A. & Heidari, Z. (2012). Citation Analysis of Hepatitis Monthly by Journal Citation Report (ISI), Google Scholar, and Scopus. *Hepatitis Monthly*, 12(9), e7441.
- Moskovkin, V.M. (2009). The potential of using the Google Scholar search engine for estimating the publication activities of universities. *Scientific and Technical Information Processing*, 36(4), 198–202.
- Neuhaus, C., Neuhaus, E., Asher, A., & Wrede, C. (2006). The depth and breadth of Google Scholar: An empirical study. *Portal: Libraries and the Academy*, 6(2), 127-141.
- Noruzi, A. (2005). Google Scholar: The New Generation of Citation Indexes. *Libri*, 55(4), 170-180.
- Onyancha, O.B. & Ocholla, D.N. (2009). Assessing researchers' performance in developing countries: is Google scholar an alternative?. *Mousaion*, 27(1), 43–64.
- Orduña-Malea, E. & Delgado López-Cózar, E. (in press). The dark side of Open Access in Google Scholar: the case of Latin-American repositories. *Scientometrics*.
- Ortega, J.L. & Aguillo, I.F. (2014). Microsoft Academic Search and Google Scholar Citations: Comparative analysis of author profiles. *Journal of the Association for Information Journal of the Association for Information Science and Technology*, 65(6), 1149–1156.
- Reina Leal, L.M., Repiso, R. & Delgado López-Cózar, E. (2013). H Index of scientific Nursing journals according to Google Scholar Metrics (2007-2011). *EC3 Reports*, 5.
- Salisbury, L. & Tekawade, A. (2006). Where is agricultural economics and agribusiness research information published and indexed? A comparison of coverage in Web of Knowledge, CAB Abstracts, Econlit, and Google Scholar. *Journal of agricultural & food information*, 7(2-3), 125-143.
- Šember, M., Utrobičić, A. & Petrak, J. (2010). Croatian Medical Journal Citation Score in Web of Science, Scopus, and Google Scholar. *Croatian Medical Journal*, 51(2), 99–103.
- Winter, J.C.F., Zadpoor, A. & Dodou, D. (2014). The expansion of Google Scholar versus Web of Science: a longitudinal study. *Scientometrics*, 98(2), 1547–1565.



- Yang, K. & Meho, L.I. (2006). Citation Analysis: A Comparison of Google Scholar, Scopus, and Web of Science. *Proceedings of the American Society for Information Science and Technology*, 43(1), 1–15.
- Zarifmahmoudi, L., Kianifar, H.R. & Sadeghi, R. (2013). Citation analysis of Iranian Journal of Basic Medical Sciences in ISI web of knowledge, Scopus, and Google Scholar. *Iranian Journal of Basic Medical Sciences*, 16(10), 1027–1030.
- Zarifmahmoudi, L. & Sadeghi, R. (2012). Citation analysis of Iranian journal of nuclear medicine: Comparison of SCOPUS and Google scholar. *Iranian Journal of Nuclear Medicine*, 20(2), 1–7.
